# Supplementary figures and images for: Underwater Wenzel and Cassie oleophobic behaviour
Source: Royal Society of Chemistry journal article supplement (doi:10.1039/c4ta06787h), 2015-01-01

## Supporting information

Fig. S1

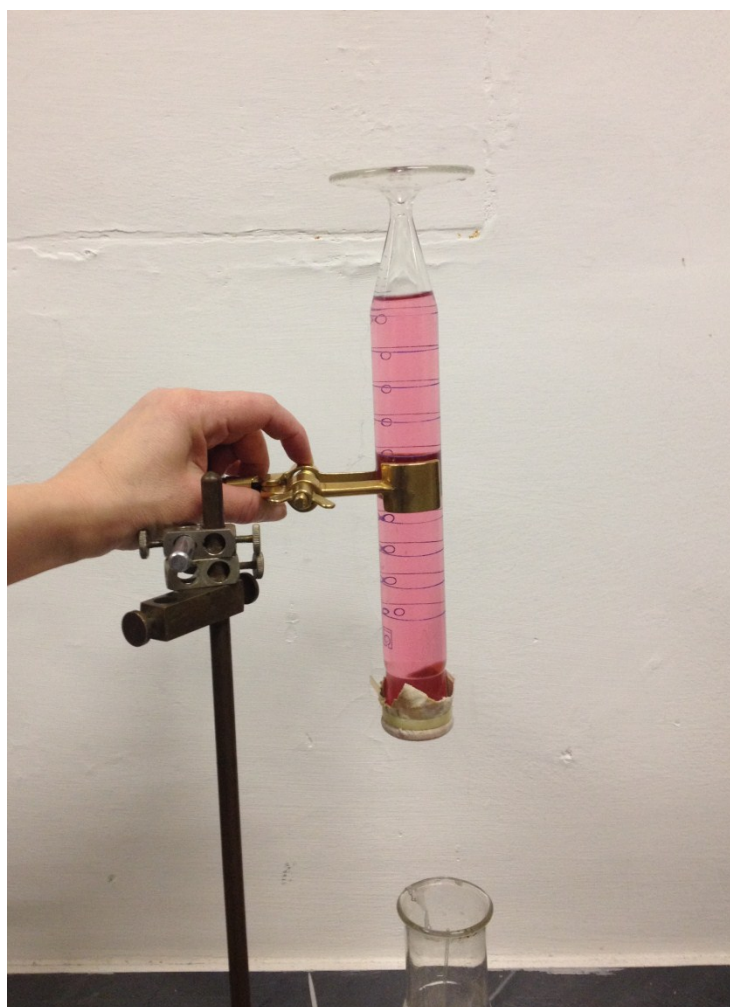

Fig. S2

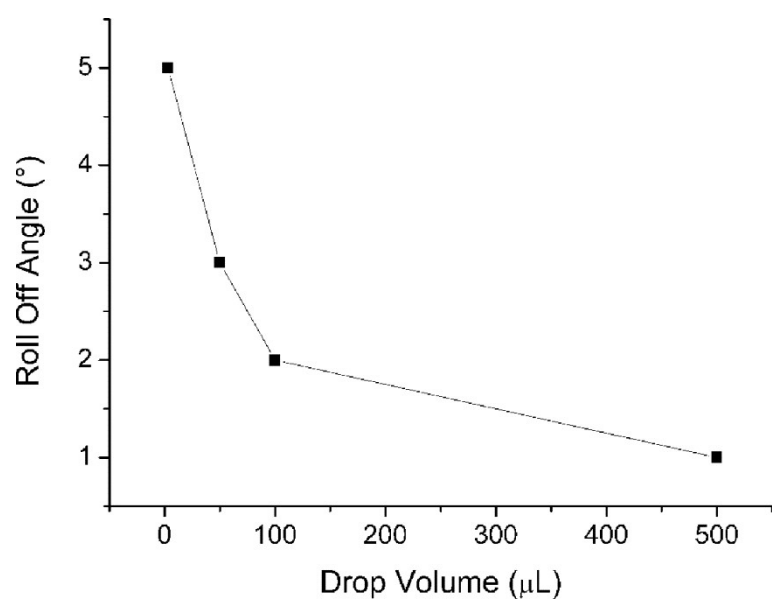

Supplement: c4ta06787h3.pdf [file c4ta06787h3.pdf]
